# Supplementary material for: Winogradsky Bioelectrochemical System as a Novel Strategy to Enrich Electrochemically Active Microorganisms from Arsenic-Rich Sediments
Source: MDPI journal article supplement (doi:10.3390/mi13111953), 2022-11-11
Supplement: s1 [file s1]

## Supplementary Information

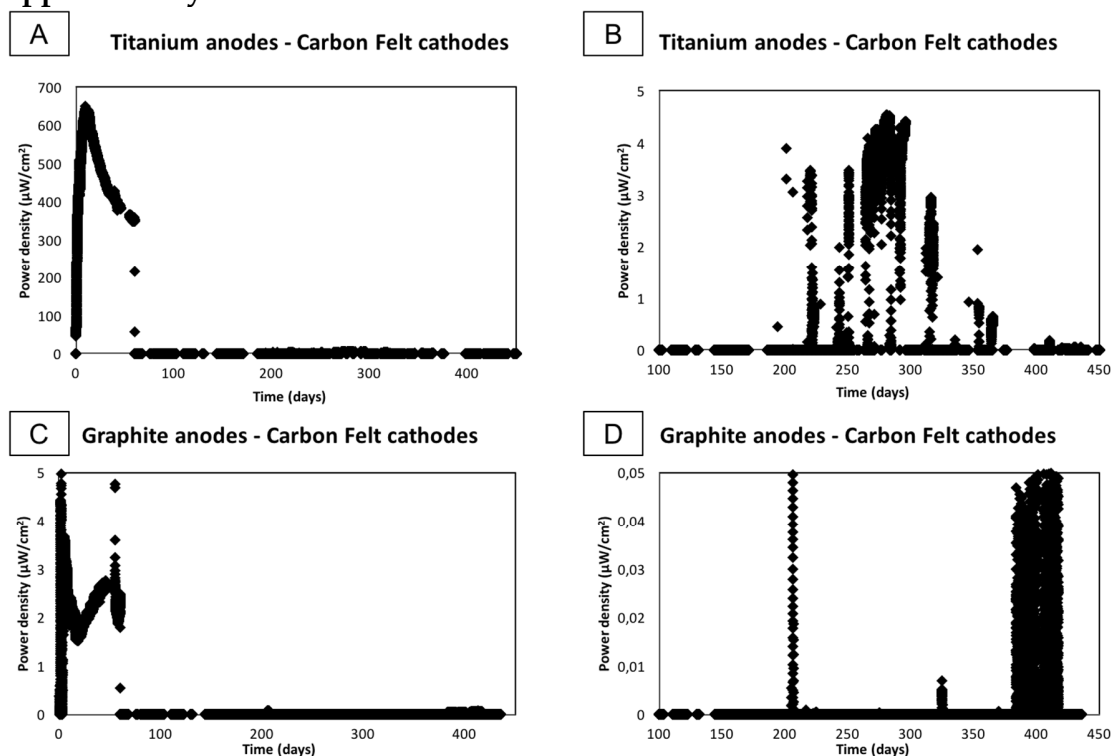

**Figure S1.** Power production during operation. (A) Average power density registered for titanium anodes – carbon felt cathodes cells during the 450 days of operation. (B) Average power density registered for titanium anodes – carbon felt cathodes cells after the first 100 days of operation. (C) Average power density registered for graphite anodes – carbon felt cathodes cells during the 450 days of operation. (D) Average power density registered for graphite anodes – carbon felt cathodes cells after the first 100 days of operation.

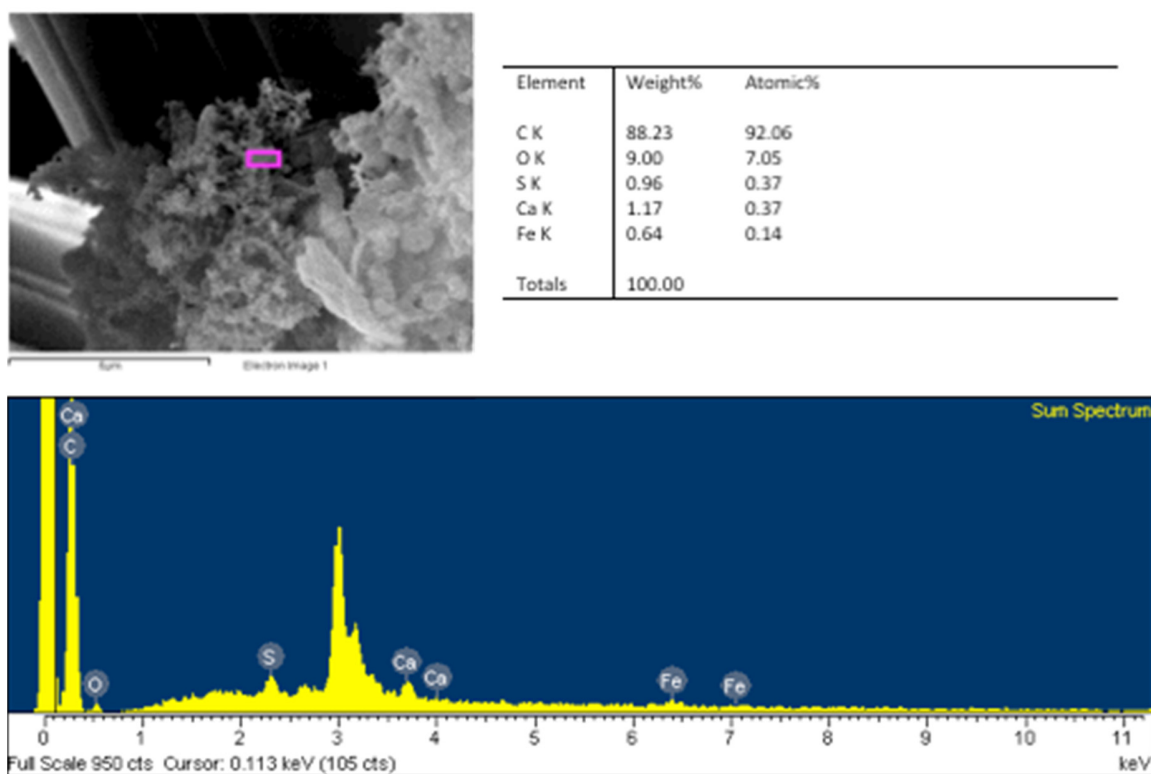

**Figure S2.** Energy dispersive analysis of mineral precipitates observed over cathode electrodes.

**Table S1.** Physicochemical characterization of sediments used for the Winogradsky-BES columns. [25]

| Parameter.   | Value                    |
|--------------|--------------------------|
| pH           | ~ 5.8                    |
| Conductivity | ~ 4 mS cm <sup>-1</sup>  |
| Arsenic      | ~ 6 mg kg <sup>-1</sup>  |
| Sulfur       | ~ 6 g Kg <sup>-1</sup>   |
| Iron         | ~ 300 g Kg <sup>-1</sup> |

**Table S2.** Isolate's taxonomy assignment by BLAST.

| Isolate ID | Closed bacteria                     | GenBank number | Query cover (%) | Identity (%) |
|------------|-------------------------------------|----------------|-----------------|--------------|
| CA1        | <i>Herbaspirillum aquaticum</i>     | NR_116605.1    | 100             | 99,82        |
| CA4        | <i>Ancylobacter aquaticus</i>       | NR_114097.1    | 100             | 98,64        |
| CA5        | <i>Rhodococcus qingshengii</i>      | NR_115708.1    | 100             | 100          |
| CA7        | <i>Rhodococcus qingshengii</i>      | NR_115708.1    | 100             | 100          |
| CA8        | <i>Rhodococcus qingshengii</i>      | NR_115708.1    | 100             | 100          |
| CB1        | <i>Methylobacterium aminovorans</i> | NR_041025.1    | 100             | 99,91        |
| CB2        | <i>Sphingomonas melonis</i>         | NR_028626.1    | 100             | 100          |
| CB5        | <i>Pseudomonas fildesensis</i>      | NR_170438.1    | 100             | 99,83        |
| CB7        | <i>Pseudomonas fildesensis</i>      | NR_170438.1    | 100             | 99,91        |
| CB8        | <i>Ancylobacter aquaticus</i>       | NR_114097.1    | 100             | 98,64        |

**Table S3.** Current density ( $\mu\text{A cm}^2$ ) at  $-0.55\text{V}$  (vs. Ag/AgCl) of the isolates.

| Isolate         | Current density ( $\mu\text{A cm}^2$ ) at $-0.55\text{ V}$ vs. Ag/AgCl |
|-----------------|------------------------------------------------------------------------|
| Cathode 1A      | $-141 \pm 37$                                                          |
| Cathode 4A      | $-140 \pm 13$                                                          |
| Cathode 5A      | $-175 \pm 3$                                                           |
| Cathode 7A      | $-294 \pm 27$                                                          |
| Cathode 8A      | $-226 \pm 52$                                                          |
| Cathode 1B      | $-125 \pm 16$                                                          |
| Cathode 2B      | $-284 \pm 129$                                                         |
| Cathode 5B      | $-231 \pm 71$                                                          |
| Cathode 7B      | $-447 \pm 38$                                                          |
| Cathode 8B      | $-413 \pm 91$                                                          |
| Abiotic control | $-118 \pm 24$                                                          |
